# Supplementary material
Source: Springer Nature journal article supplement (https://www.springermedizin.de/resource/supplementary/12958_2010_811_MOESM2_ESM.pdf/9568904)

*BMP15*

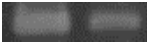

*GDF9*

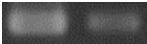

*GAPDH*

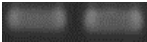

O

C

Supplement: MOESM2 [file 9568904]
